# Supplementary material
Source: publisher figshare collection journal article supplement (https://plos.figshare.com/articles/dataset/_/6494600)
Supplement: Supplementary file 1 [file 1 › pone.0198352.s001.pdf]

# Final search MEDLINE

## Concept A

Minor injuries (Musculoskeletal and soft tissue)

| 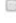 | # ▲ | Searches                                                                                                                                                                                                                                                                                                                                                                                                                                                                                                                                              | Results | Type     | Actions                                                | Annotations                                                                         |                                                                                              |
|-----------------------------------------------------------------------------------|-----|-------------------------------------------------------------------------------------------------------------------------------------------------------------------------------------------------------------------------------------------------------------------------------------------------------------------------------------------------------------------------------------------------------------------------------------------------------------------------------------------------------------------------------------------------------|---------|----------|--------------------------------------------------------|-------------------------------------------------------------------------------------|----------------------------------------------------------------------------------------------|
| 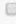 | 1   | arm injuries/ or forearm injuries/ or wrist injuries/ or back injuries/ or fractures, cartilage/ or hand injuries/ or finger injuries/ or lacerations/ or leg injuries/ or ankle injuries/ or foot injuries/ or knee injuries/ or neck injuries/ or whiplash injuries/ or soft tissue injuries/ or "sprains and strains"/ or tendon injuries/ or contusions/ or head injuries, closed/ or brain concussion/                                                                                                                                           | 102856  | Advanced | <a href="#">Display Results</a> <a href="#">More ▼</a> | 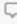 | 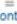 Contract |
| 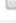 | 2   | exp Musculoskeletal System/in [Injuries]                                                                                                                                                                                                                                                                                                                                                                                                                                                                                                              | 101016  | Advanced | <a href="#">Display Results</a> <a href="#">More ▼</a> | 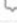 |                                                                                              |
| 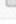 | 3   | exp Whiplash Injuries/                                                                                                                                                                                                                                                                                                                                                                                                                                                                                                                                | 3136    | Advanced | <a href="#">Display Results</a> <a href="#">More ▼</a> | 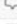 |                                                                                              |
| 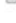 | 4   | ((head* or neck* or shoulder* or arm* or forearm* or wrist* or hand* or finger* or upper limb* or upper extremity* or back* or pelvis* or pelvic* or leg* or knee* or foot* or ankle* or feet* or lower limb* or lower extremity* or toe*) adj3 (injur* or contusion or concussion* or abrasion* or laceration* or sprain* or strain*)).mp. [mp=title, abstract, original title, name of substance word, subject heading word, keyword heading word, protocol supplementary concept word, rare disease supplementary concept word, unique identifier] | 120673  | Advanced | <a href="#">Display Results</a> <a href="#">More ▼</a> | 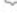 |                                                                                              |
| 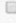 | 5   | whiplash*.mp.                                                                                                                                                                                                                                                                                                                                                                                                                                                                                                                                         | 3531    | Advanced | <a href="#">Display Results</a> <a href="#">More ▼</a> | 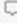 |                                                                                              |
| 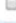 | 6   | (minor adj (injur* or contusion or concussion* or abrasion* or laceration* or sprain* or strain*)).mp.                                                                                                                                                                                                                                                                                                                                                                                                                                                | 1796    | Advanced | <a href="#">Display Results</a> <a href="#">More ▼</a> | 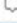 |                                                                                              |
| 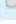 | 7   | 1 or 2 or 3 or 4 or 5 or 6                                                                                                                                                                                                                                                                                                                                                                                                                                                                                                                            | 220258  | Advanced | <a href="#">Display Results</a> <a href="#">More ▼</a> | 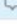 |                                                                                              |

## Concept B

Transport-related accident/injury

|                                                                                     |    |                                                                                                                                                                                                                                                |       |          |                                                        |                                                                                       |
|-------------------------------------------------------------------------------------|----|------------------------------------------------------------------------------------------------------------------------------------------------------------------------------------------------------------------------------------------------|-------|----------|--------------------------------------------------------|---------------------------------------------------------------------------------------|
| 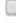 | 8  | Accidents, Traffic/                                                                                                                                                                                                                            | 40111 | Advanced | <a href="#">Display Results</a> <a href="#">More ▼</a> | 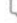 |
| 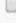 | 9  | ((car or cars or truck or trucks or automobile* or cyclist* or cycling* or cycle* or pedestrian* or passenger* or driver* or motor* or vehicle* or vehicul* or transport* or traffic*) adj3 (accident* or collision* or crash* or smash*)).mp. | 49562 | Advanced | <a href="#">Display Results</a> <a href="#">More ▼</a> | 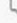 |
| 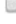 | 10 | 8 or 9                                                                                                                                                                                                                                         | 49562 | Advanced | <a href="#">Display Results</a> <a href="#">More ▼</a> | 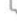 |

## Concept C

Types of studies including limitations to English language and year 2000 – current

|                                                                           |  |        |                          |
|---------------------------------------------------------------------------|--|--------|--------------------------|
| [-] <input checked="" type="checkbox"/> Clinical Studies as topic         |  | 90     | <input type="checkbox"/> |
| [-] <input checked="" type="checkbox"/> Epidemiologic Studies             |  | 7951   | <input type="checkbox"/> |
| [-] <input checked="" type="checkbox"/> Case-Control Studies              |  | 250992 | <input type="checkbox"/> |
| <input checked="" type="checkbox"/> Retrospective Studies                 |  | 643251 | <input type="checkbox"/> |
| [-] <input checked="" type="checkbox"/> Cohort Studies                    |  | 233587 | <input type="checkbox"/> |
| <input checked="" type="checkbox"/> Follow-Up Studies                     |  | 595124 | <input type="checkbox"/> |
| [-] <input checked="" type="checkbox"/> Longitudinal Studies              |  | 120932 | <input type="checkbox"/> |
| <input type="checkbox"/> National Longitudinal Study of Adolescent Health |  | 125    | <input type="checkbox"/> |
| <input checked="" type="checkbox"/> Prospective Studies                   |  | 464937 | <input type="checkbox"/> |
| <input checked="" type="checkbox"/> Retrospective Studies                 |  | 643251 | <input type="checkbox"/> |
| <input type="checkbox"/> Controlled Before-After Studies                  |  | 208    | <input type="checkbox"/> |
| <input checked="" type="checkbox"/> Cross-Sectional Studies               |  | 255004 | <input type="checkbox"/> |
| <input type="checkbox"/> Historically Controlled Study                    |  | 87     | <input type="checkbox"/> |

|                          |    |                                                                                                                                                                                                 |         |          |                                 |                        |  |
|--------------------------|----|-------------------------------------------------------------------------------------------------------------------------------------------------------------------------------------------------|---------|----------|---------------------------------|------------------------|--|
| <input type="checkbox"/> | 11 | 7 and 10                                                                                                                                                                                        | 10964   | Advanced | <a href="#">Display Results</a> | <a href="#">More ▾</a> |  |
| <input type="checkbox"/> | 12 | epidemiologic studies/ or case-control studies/ or retrospective studies/ or cohort studies/ or follow-up studies/ or longitudinal studies/ or prospective studies/ or cross-sectional studies/ | 2109829 | Advanced | <a href="#">Display Results</a> | <a href="#">More ▾</a> |  |
| <input type="checkbox"/> | 13 | qualitative research/                                                                                                                                                                           | 33787   | Advanced | <a href="#">Display Results</a> | <a href="#">More ▾</a> |  |
| <input type="checkbox"/> | 14 | case control.mp.                                                                                                                                                                                | 277453  | Advanced | <a href="#">Display Results</a> | <a href="#">More ▾</a> |  |
| <input type="checkbox"/> | 15 | ((follow up or followup) adj (study or studies)).mp.                                                                                                                                            | 612189  | Advanced | <a href="#">Display Results</a> | <a href="#">More ▾</a> |  |
| <input type="checkbox"/> | 16 | (observational adj (study or studies)).mp.                                                                                                                                                      | 82240   | Advanced | <a href="#">Display Results</a> | <a href="#">More ▾</a> |  |
| <input type="checkbox"/> | 17 | ((observational or prospective or retrospective) adj (study or studies)).mp.                                                                                                                    | 1191717 | Advanced | <a href="#">Display Results</a> | <a href="#">More ▾</a> |  |
| <input type="checkbox"/> | 18 | Cross sectional.mp.                                                                                                                                                                             | 324661  | Advanced | <a href="#">Display Results</a> | <a href="#">More ▾</a> |  |
| <input type="checkbox"/> | 19 | (cohort adj (study or studies)).mp.                                                                                                                                                             | 296992  | Advanced | <a href="#">Display Results</a> | <a href="#">More ▾</a> |  |
| <input type="checkbox"/> | 20 | (qualitative adj (study or studies)).mp.                                                                                                                                                        | 23731   | Advanced | <a href="#">Display Results</a> | <a href="#">More ▾</a> |  |
| <input type="checkbox"/> | 21 | 12 or 13 or 14 or 15 or 16 or 17 or 18 or 19 or 20                                                                                                                                              | 2331533 | Advanced | <a href="#">Display Results</a> | <a href="#">More ▾</a> |  |
| <input type="checkbox"/> | 22 | 11 and 21                                                                                                                                                                                       | 3108    | Advanced | <a href="#">Display Results</a> | <a href="#">More ▾</a> |  |
| <input type="checkbox"/> | 23 | limit 22 to (english language and humans and yr="2006 -Current")                                                                                                                                | 1401    | Advanced | <a href="#">Display Results</a> | <a href="#">More ▾</a> |  |
